# Supplementary material for: SU5416 does not attenuate early RV angiogenesis in the murine chronic hypoxia PH model
Source: PubMed Central journal article supplement (PMC6580559; doi:10.1186/s12931-019-1079-x), 2019-06-17

Figure S2

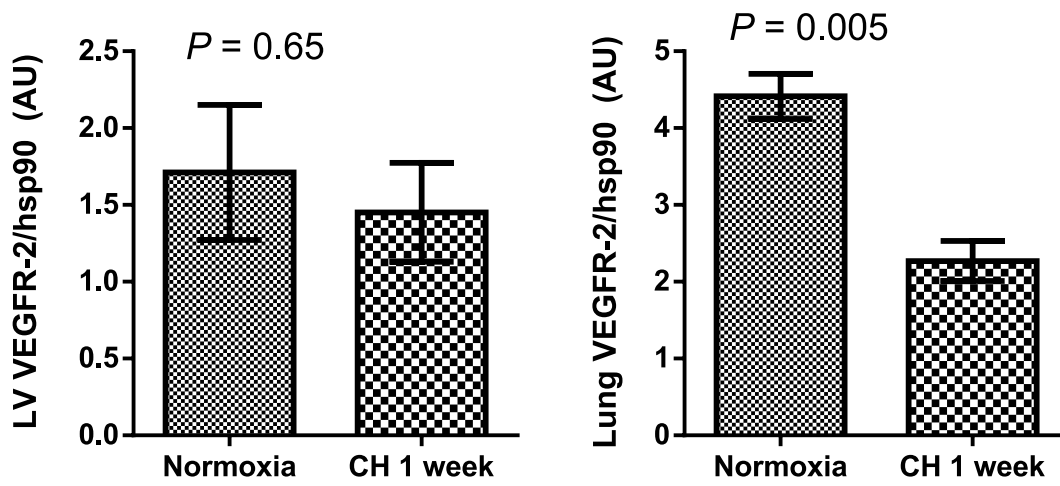

Supplement: 12931_2019_1079_MOESM2_ESM.pdf [file 12931_2019_1079_MOESM2_ESM.pdf]
